# Supplementary material for: Determination of quinolone antibiotics in honey by pH-induced natural deep eutectic solvent combined with vortex-assisted dispersive liquid–liquid microextraction
Source: Royal Society of Chemistry journal article supplement (doi:10.1039/d2ay01172g), 2022-01-01
Supplement: d2ay01172g1.pdf [file d2ay01172g1.pdf]

**Determination of quinolone antibiotics in honey by pH-  
induced natural deep eutectic solvent combined with vortex-  
assisted dispersive liquid-liquid microextraction**

Xiaoming Zhu<sup>1</sup>, Chenyang Zhao<sup>1</sup>, Jun Liu, Feng Qin\*, Zhili Xiong\*,  
Longshan Zhao

(School of Pharmacy, Shenyang Pharmaceutical University, Shenyang,  
Liaoning 110016, China)

Corresponding author: School of Pharmacy, Shenyang Pharmaceutical  
University, 103 Wenhua Road Shenhe District, 110016, Shenyang,  
Liaoning Province, P. R. China.

\* Corresponding author.

E-mail addresses: qf-1998@163.com (Feng Qin), bearry200@126.com  
(Zhili Xiong).

1: These authors contributed equally to this work.

Table S1 The composition and molar ratio of NADESs investigated in the study

| Abbreviation | Hydrogen bond donor | Hydrogen bond acceptor | Molar ratio |
|--------------|---------------------|------------------------|-------------|
| NADES1       | Dodecanol           | Octanoic acid          | 1:1         |
| NADES2       | Octanoic acid       | Lauric acid            | 3:1         |
| NADES3       | Thymol              | Octanol                | 1:1         |
| NADES4       | Thymol              | Octanoic acid          | 1:1         |
| NADES5       | Thymol              | Decanoic acid          | 1:1         |
| NADES6       | DL-menthol          | Octanoic acid          | 1:1         |
| NADES7       | DL-menthol          | Decanoic acid          | 1:1         |
| NADES8       | DL-menthol          | Thymol                 | 1:1         |

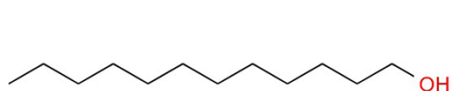

Dodecanol (C<sub>12</sub>H<sub>26</sub>O)

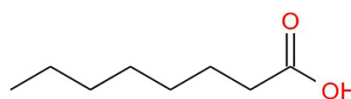

Octanoic acid (C<sub>8</sub>H<sub>16</sub>O<sub>2</sub>)

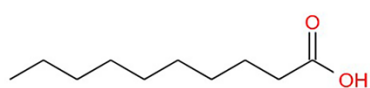

Decanoic acid(C<sub>10</sub>H<sub>20</sub>O<sub>2</sub>)

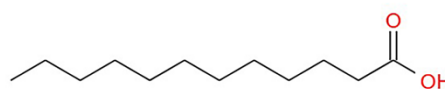

Lauric acid (C<sub>12</sub>H<sub>24</sub>O<sub>2</sub>)

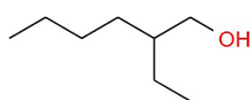

Octanol (C<sub>8</sub>H<sub>18</sub>O)

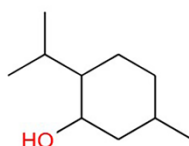

DL-menthol (C<sub>10</sub>H<sub>20</sub>O)

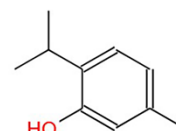

Thymol (C<sub>10</sub>H<sub>14</sub>O)

Fig.S1 Chemical and structural formulae for hydrogen bond acceptors  
and hydrogen bond donors

Table S2 Matrix effect (ME) of the proposed method

| Analytes | ME (mean± SD) (%) |
|----------|-------------------|
| OFL      | 99.7±2.6          |
| CIP      | 101.3±3.2         |
| ENR      | 95.1±2.7          |

Table S3 Determination of ofloxacin, ciprofloxacin and enrofloxacin in six honey samples

| Analyte | Honey 1 | Honey 2 | Honey 3 | Honey 4 | Honey 5 | Honey 6 |
|---------|---------|---------|---------|---------|---------|---------|
| OFL     | ND      | ND      | ND      | ND      | ND      | ND      |
| CIP     | ND      | ND      | ND      | ND      | ND      | ND      |
| ENR     | ND      | ND      | ND      | ND      | ND      | ND      |

ND, not detected

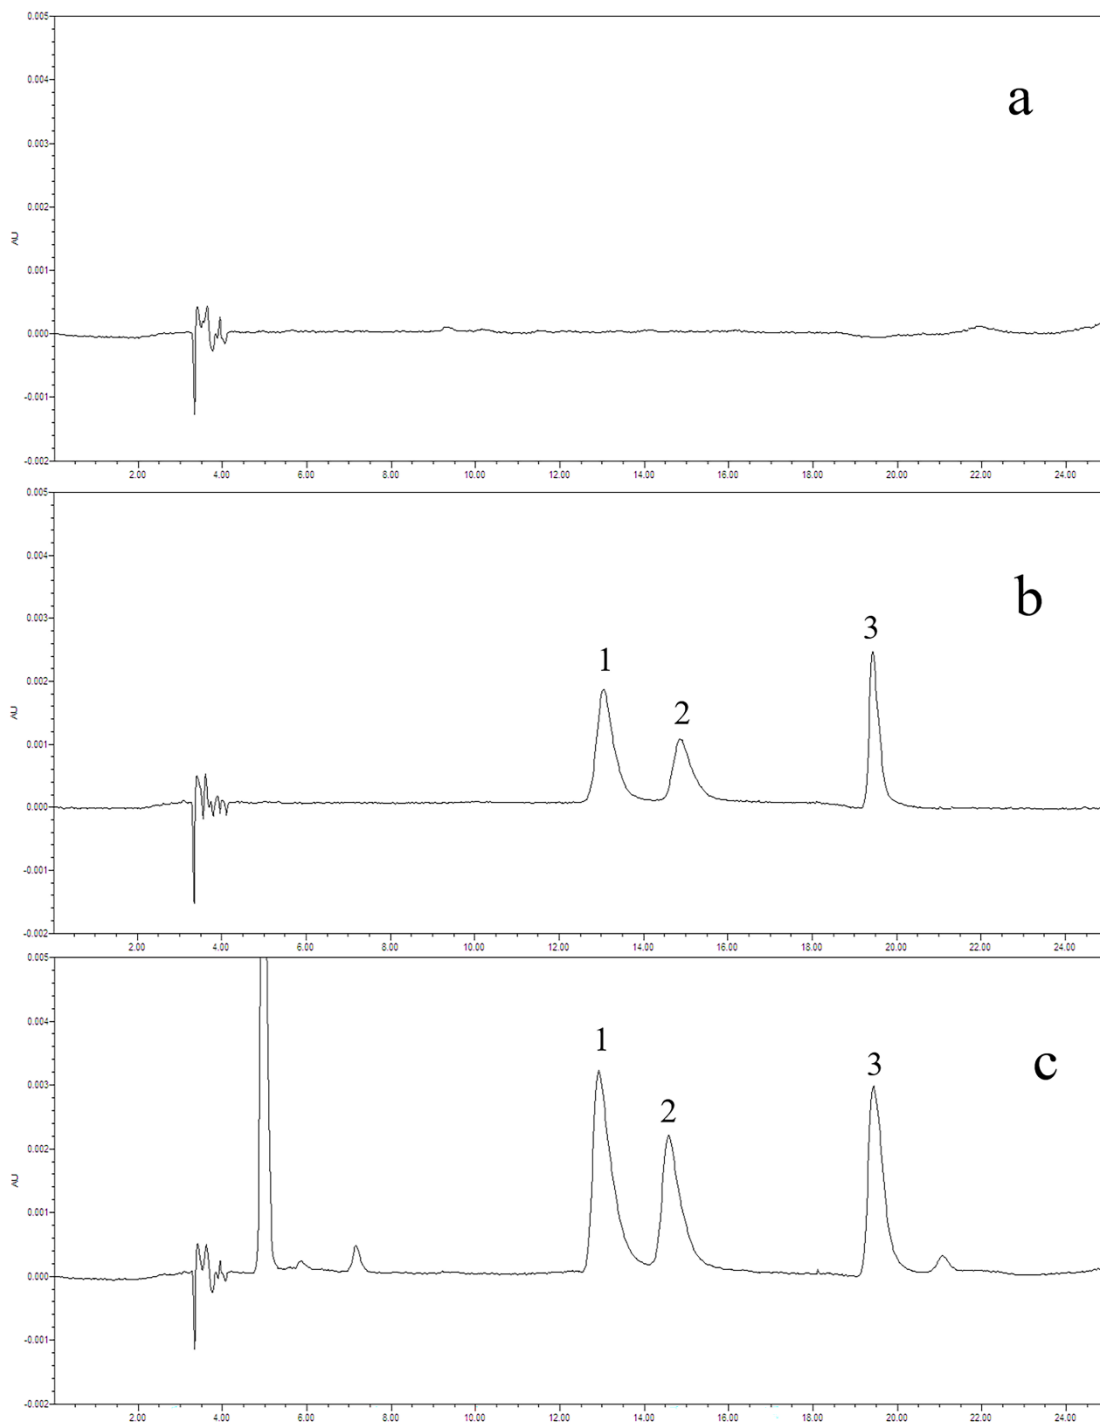

**Fig.S2** The chromatograms of the blank solution (a), the mixed standard solution (b), and spiked sample solution (c). 1.Ofloxacin; 2. Ciprofloxacin hydrochloride; 3. Enrofloxac
